# Supplementary material for: Palladium(ii) complexes with chiral organoantimony(iii) ligands. Solution behaviour and solid state structures
Source: Royal Society of Chemistry journal article supplement (doi:10.1039/c4ra03482a), 2014-01-01
Supplement: c4ra03482a1.pdf [file c4ra03482a1.pdf]

## **Palladium(II) complexes with chiral organoantimony(III) ligands. Solution behaviour and solid state structures**

**Dana Copolovici,<sup>a</sup> Francesco Isaia,<sup>b</sup> Hans J. Breunig,<sup>c</sup> Ciprian I. Raț<sup>\*a</sup> and Cristian Silvestru<sup>\*a</sup>**

<sup>a</sup> *Departamentul de Chimie, Centrul de Chimie Supramoleculară Organică și Organometalică (CCSOOM), Facultatea de Chimie și Inginerie Chimică, Universitatea Babeș-Bolyai, RO-400028, Cluj-Napoca, Romania. E-mail: ciprian.rat@ubbcluj.ro, cristian.silvestru@ubbcluj.ro; Fax: (+40) 264-590818; Tel: (+40) 264-593833*

<sup>b</sup> *Dipartimento di Scienze Chimiche e Geologiche, Università degli Studi di Cagliari, S.S. 554 Bivio per Sestu, 09042 Monserrato (CA), Italy. E-mail: isaia@unica.it*

<sup>c</sup> *Institut für Anorganische und Physikalische Chemie, Universität Bremen, 28334 Bremen, Germany. E-mail: hbreunig@uni-bremen.de*

(2-Me<sub>2</sub>NCH<sub>2</sub>C<sub>6</sub>H<sub>4</sub>)PhSbCl (1)

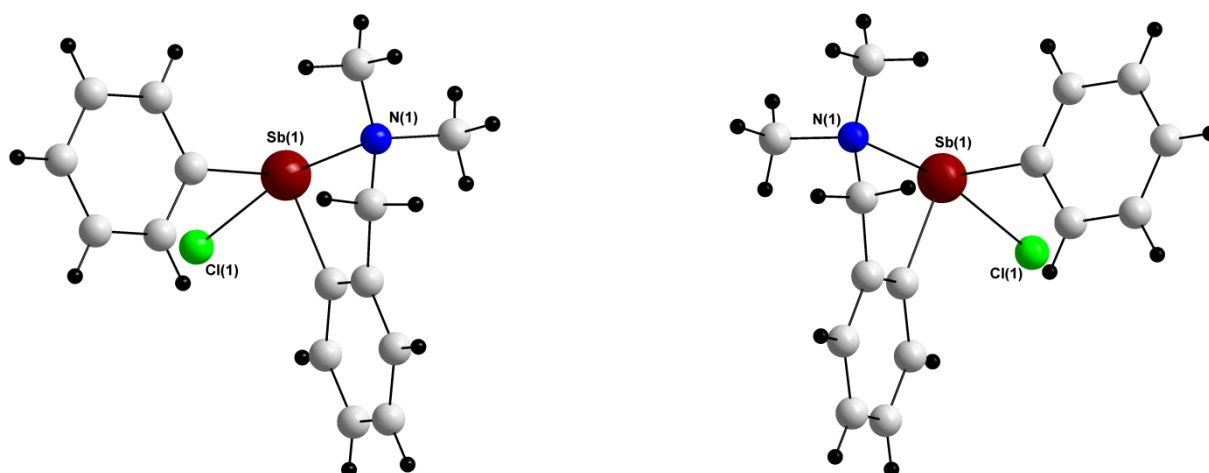

**Fig. S1** Molecular structure of ( $R_N, A_{Sb}$ ) [or ( $R_N, S_{Sb}$ )] (*left*) and ( $S_N, C_{Sb}$ ) [or ( $S_N, R_{Sb}$ )] (*right*) isomers of **1**.

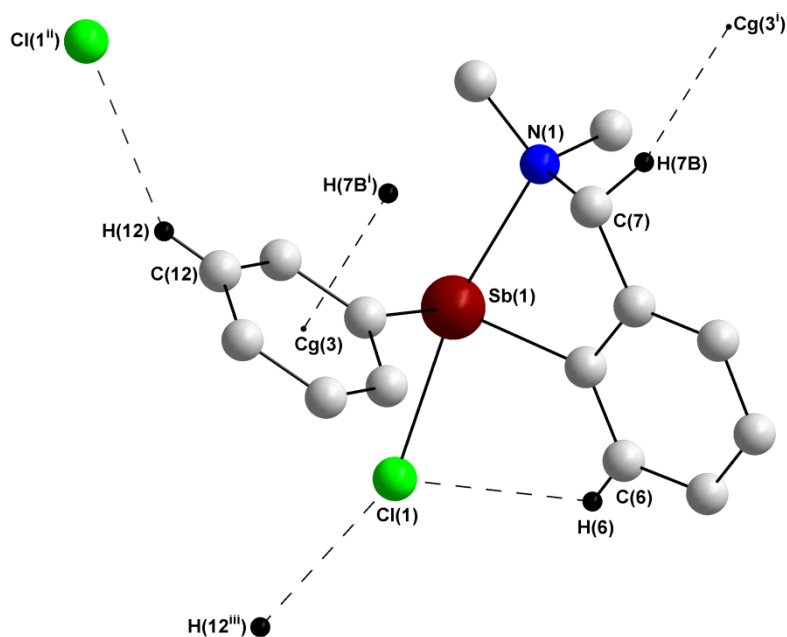

**Fig. S2** Intramolecular and intermolecular C–H···Cl and C–H···Cg interactions in the crystal of **1** [Cg is the centroid of the phenyl ring C(10)–C(15)]. Symmetry codes: (i)  $1-x, -y, 2-z$ ; (ii)  $1/2-x, -1/2+y, 3/2-z$ ; (iii)  $1/2-x, 1/2+y, 3/2-z$ .

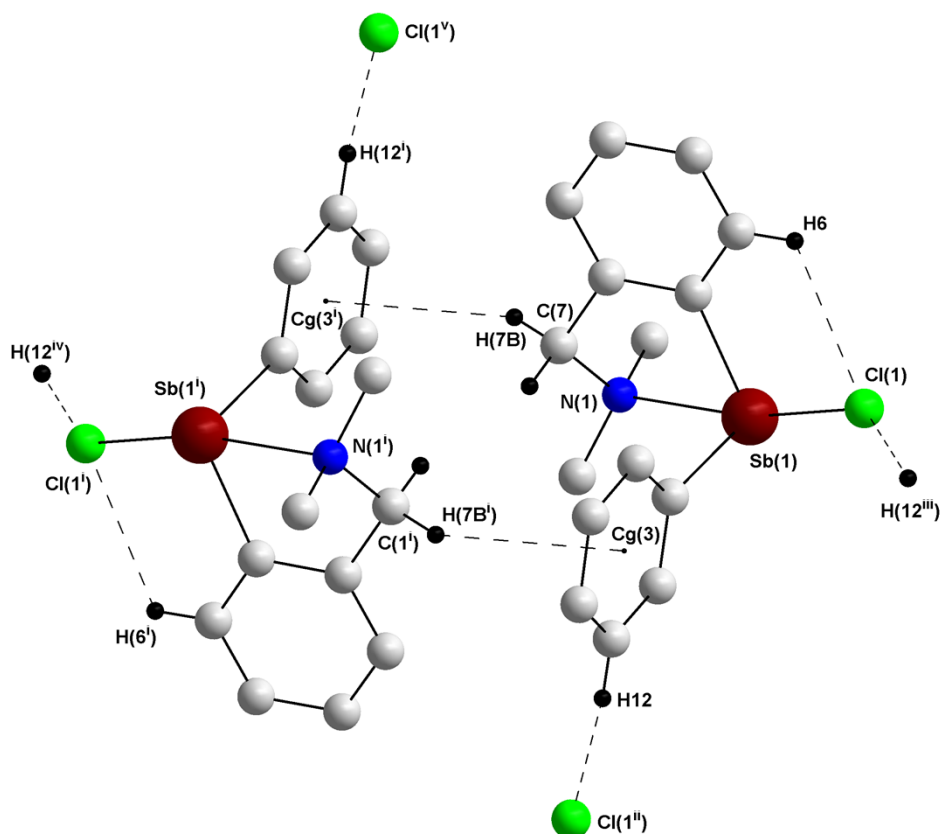

**Fig. S3** Dimer association of  $(R_N, A_{Sb})$ -**1** and  $(S_N, C_{Sb})$ -**1** isomers in the layer structure of **1**. Symmetry codes: (i)  $1-x, -y, 2-z$ ; (ii)  $1/2-x, -1/2+y, 3/2-z$ ; (iii)  $1/2-x, 1/2+y, 3/2-z$ ; (iv)  $1/2+x, -1/2-y, 1/2+z$ ; (v)  $1/2+x, 1/2-y, 1/2+z$ .

**Table S1** Bond lengths and interatomic distances (Å) and angles ( $^\circ$ ) for intramolecular and intermolecular C–H $\cdots$ Cl and C–H $\cdots$ Cg interactions in the crystals of **1**.

| $D-H\cdots A$                             | $D-H$ | $A\cdots H$ | $D\cdots A$ | $D-H\cdots A$ |
|-------------------------------------------|-------|-------------|-------------|---------------|
| C(6)–H(6) $\cdots$ Cl(1)                  | 0.93  | 2.74        | 3.327(3)    | 122           |
| C(12)–H(12) $\cdots$ Cl(1 <sup>ii</sup> ) | 0.93  | 2.80        | 3.594(4)    | 144           |
| C(7)–H(7B) $\cdots$ Cg(3 <sup>i</sup> )   | 0.97  | 2.97        | 3.839(4)    | 149           |

Symmetry codes: (i)  $1-x, -y, 2-z$ ; (ii)  $1/2-x, -1/2+y, 3/2-z$ .

(2-Me<sub>2</sub>NCH<sub>2</sub>C<sub>6</sub>H<sub>4</sub>)Mes<sub>2</sub>Sb (**2**)

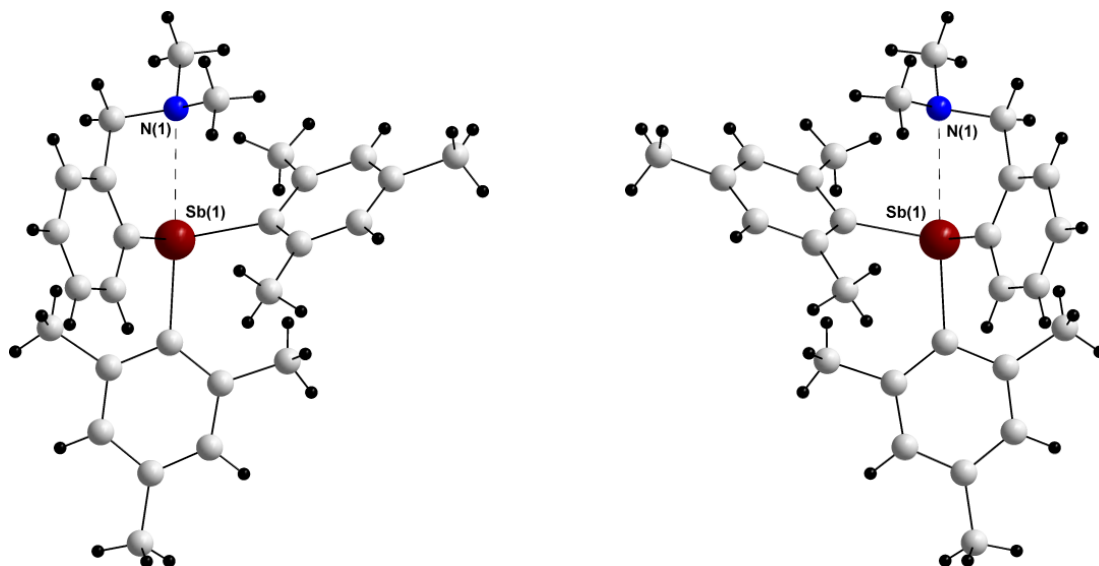

**Fig. S4** Molecular structure of the (*R*<sub>N</sub>,*C*<sub>Sb</sub>) (*left*) and of the (*S*<sub>N</sub>,*A*<sub>Sb</sub>) (*right*) isomers of **2**.

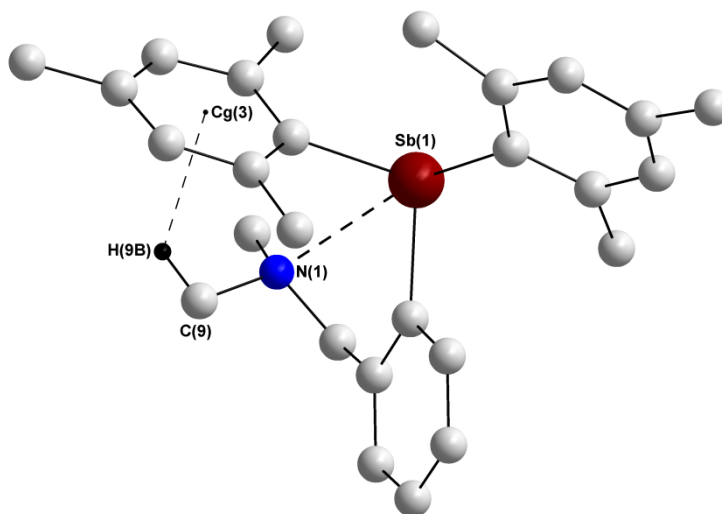

**Fig. S5** Intramolecular C–H···Cg interactions in the crystal structure of **2** [Cg(3) is the centroid of the benzene ring C(19)–C(24)].

**Table S2** Bond lengths and interatomic distances (Å) and angles (°) for intramolecular C–H···Cg interactions in the crystals of **2**.

| <i>D</i> – <i>H</i> ··· <i>A</i> | <i>D</i> – <i>H</i> | <i>A</i> ··· <i>H</i> | <i>D</i> ··· <i>A</i> | <i>D</i> – <i>H</i> ··· <i>A</i> |
|----------------------------------|---------------------|-----------------------|-----------------------|----------------------------------|
| C(9)–H(9B)···Cg(3)               | 0.97                | 2.92                  | 3.546(5)              | 124                              |

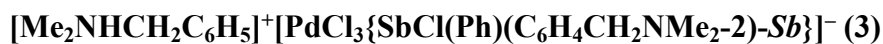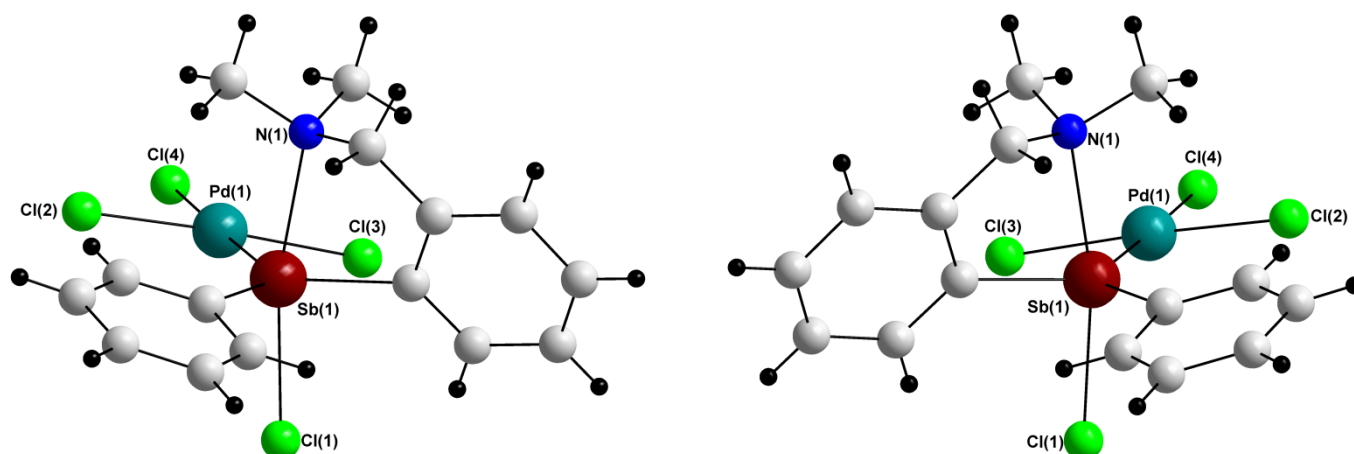

**Fig. S6** Structure of  $(R_N, A_{\text{Sb}})$  (left) and  $(S_N, C_{\text{Sb}})$  (right) anions in the crystal structure of **3**.

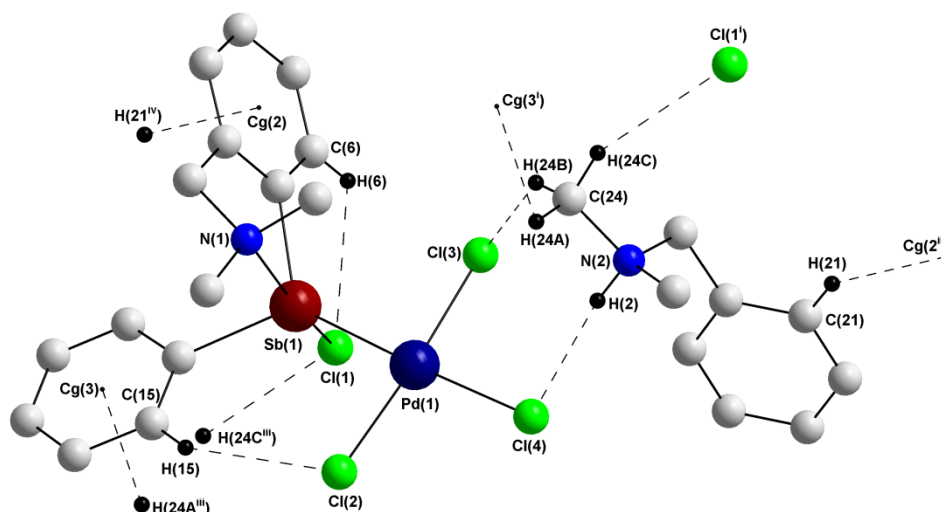

**Fig. S7** Intramolecular and intermolecular C–H $\cdots$ Cl and C–H $\cdots$ Cg interactions in the crystal structure of **3** [Cg(2) and Cg(3) are the centroids of the benzene rings C(1)–C(6) and C(10)–C(15), respectively]. Symmetry codes: (i)  $x, -1+y, z$ ; (ii)  $-1+x, -1+y, z$ ; (iii)  $x, 1+y, z$ ; (iv)  $1+x, 1+y, z$ .

**Table S3** Bond lengths and interatomic distances (Å) and angles (°) for intermolecular and intermolecular C–H $\cdots$ Cl and C–H $\cdots$ Cg interactions in the crystals of **3**.

| $D\text{-H}\cdots A$                      | $D\text{-H}$ | $A\cdots H$ | $D\cdots A$ | $D\text{-H}\cdots A$ |
|-------------------------------------------|--------------|-------------|-------------|----------------------|
| N(2)–H(2) $\cdots$ Cl(4)                  | 0.87(6)      | 2.25(6)     | 3.111(8)    | 171(8)               |
| C(6)–H(6) $\cdots$ Cl(1)                  | 0.93         | 2.78        | 3.333(9)    | 119                  |
| C(15)–H(15) $\cdots$ Cl(2)                | 0.93         | 2.70        | 3.511(10)   | 146                  |
| C(24)–H(24B) $\cdots$ Cl(3)               | 0.96         | 2.69        | 3.432(11)   | 135                  |
| C(24)–H(24C) $\cdots$ Cl(1 <sup>i</sup> ) | 0.96         | 2.73        | 3.624(11)   | 156                  |
| C(21)–H(21) $\cdots$ Cg(2 <sup>iv</sup> ) | 0.93         | 3.00        | 3.848(11)   | 153                  |
| C(24)–H(24A) $\cdots$ Cg(3 <sup>i</sup> ) | 0.96         | 2.95        | 3.443(12)   | 113                  |

Symmetry codes: (i)  $x, -1+y, z$ ; (ii)  $-1+x, -1+y, z$ ; (iii)  $x, 1+y, z$ ; (iv)  $1+x, 1+y, z$ .

[PdCl<sub>2</sub>{SbMes<sub>2</sub>(C<sub>6</sub>H<sub>4</sub>CH<sub>2</sub>NMe<sub>2</sub>-2)-N,Sb}] (4)

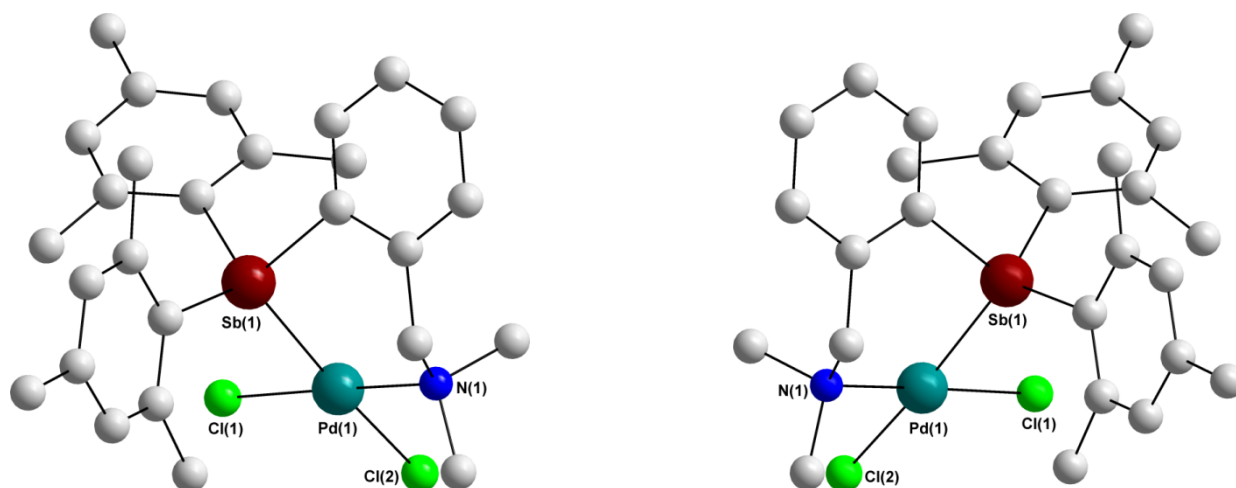

**Fig. S8** Molecular structure of (*S<sub>N</sub>*) (*left*) and (*R<sub>N</sub>*) (*right*) isomers in the crystal structure of **4**. The hydrogen atoms were omitted for clarity.

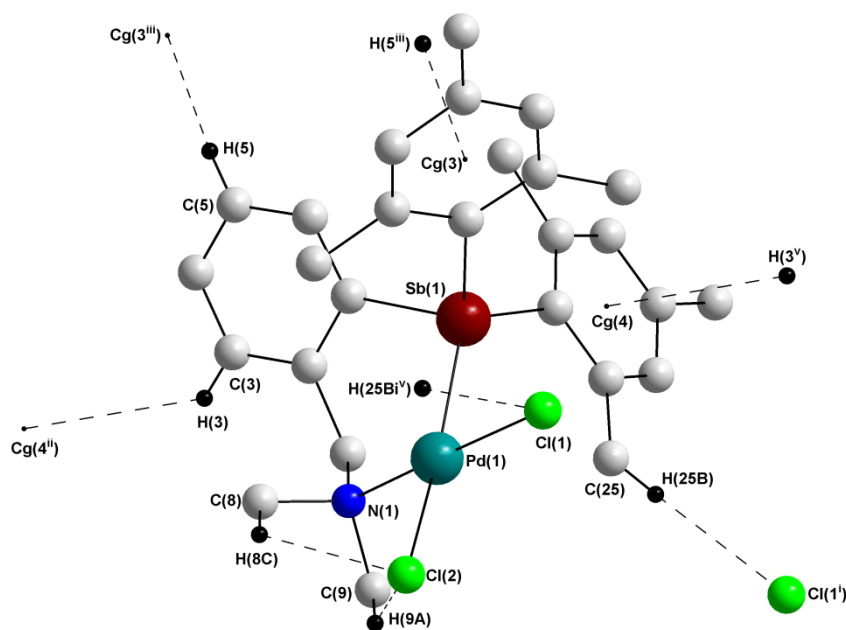

**Fig. S9** Intramolecular and intermolecular C–H···Cl and C–H···Cg interactions in the crystal structure of **4** [Cg(3) and Cg(4) are the centroids of the benzene rings C(10)–C(15) and C(19)–C(24), respectively]. Symmetry codes: (i)  $1/2+x, 1/2-y, 1/2+z$ ; (ii)  $-1+x, y, z$ ; (iii)  $-x, -y, -z$ ; (iv)  $-1/2+x, 1/2-y, -1/2+z$ ; (v)  $1+x, y, z$ .

**Table S4** Bond lengths and interatomic distances (Å) and angles (°) for intramolecular and intermolecular C–H···Cl and C–H···Cg interactions in the crystals of **4**.

| <i>D–H···A</i>                     | <i>D–H</i> | <i>A···H</i> | <i>D···A</i> | <i>D–H···A</i> |
|------------------------------------|------------|--------------|--------------|----------------|
| C(9)–H(9A)···Cl(2)                 | 0.96       | 2.61         | 3.303(5)     | 129            |
| C(25)–H(25B)···Cl(1 <sup>i</sup> ) | 0.96       | 2.73         | 3.686(6)     | 177            |
| C(3)–H(3)···Cg(4)                  |            | 2.98         | 3.681(6)     | 133            |
| C(5)–H(5)···Cg(3)                  |            | 2.68         | 3.428(5)     | 138            |

Symmetry codes: (i)  $1/2+x, 1/2-y, 1/2+z$ ; (ii)  $-1+x, y, z$ ; (iii)  $-x, -y, -z$

**Table S5** Comparison of selected bond lengths (Å) and angles (°) of the calculated and determined molecular structure of **1**.

|                   | X-ray  | DFT     | Abs. err. (%) | Rel. err. (%) |
|-------------------|--------|---------|---------------|---------------|
| Sb(1)–C(1)        | 2.147  | 2.18464 | –0.04         | 1.7           |
| Sb(1)–C(10)       | 2.153  | 2.17348 | –0.02         | 0.9           |
| Sb(1)–Cl(1)       | 2.5111 | 2.47450 | 0.04          | 1.5           |
| Sb(1)–N(1)        | 2.452  | 2.66287 | –0.21         | 7.9           |
|                   |        |         |               |               |
| C(1)–Sb(1)–C(10)  | 94.98  | 94.749  | 0.23          | 0.2           |
| C(1)–Sb(1)–Cl(1)  | 91.00  | 92.681  | –1.68         | 1.8           |
| C(10)–Sb(1)–Cl(1) | 88.54  | 92.467  | –3.93         | 4.2           |
| C(1)–Sb(1)–N(1)   | 74.59  | 72.291  | 2.30          | 3.2           |
| C(10)–Sb(1)–N(1)  | 88.78  | 82.739  | 6.04          | 7.3           |
| Cl(1)–Sb(1)–N(1)  | 165.05 | 163.680 | 1.37          | 0.8           |

**Table S6** Comparison of selected bond lengths (Å) and angles (°) of the calculated and determined molecular structure of **2**.

|                   | X-ray  | DFT     | Abs. err. (%) | Rel. err. (%) |
|-------------------|--------|---------|---------------|---------------|
| Sb(1)–C(1)        | 2.172  | 2.19776 | –0.03         | 1.2           |
| Sb(1)–C(10)       | 2.203  | 2.21391 | –0.01         | 0.5           |
| Sb(1)–C(19)       | 2.178  | 2.19734 | –0.02         | 0.9           |
| Sb(1)–N(1)        | 3.052  | 3.02215 | 0.03          | 1.0           |
|                   |        |         |               |               |
| C(1)–Sb(1)–C(19)  | 100.95 | 100.557 | 0.39          | 0.4           |
| C(1)–Sb(1)–C(10)  | 96.06  | 95.235  | 0.83          | 0.9           |
| C(10)–Sb(1)–C(19) | 104.88 | 103.260 | 1.62          | 1.6           |
| C(1)–Sb(1)–N(1)   | 67.54  | 68.342  | –0.80         | 1.2           |
| C(10)–Sb(1)–N(1)  | 162.4  | 160.589 | 1.81          | 1.1           |
| C(19)–Sb(1)–N(1)  | 73.46  | 71.217  | 2.24          | 3.1           |

**Table S7** Comparison of selected bond lengths (Å) and angles (°) of the calculated and determined molecular structure of the anion of **3**.

|                   | X-ray  | DFT     | Abs. err.<br>(%) | Rel. err.<br>(%) |
|-------------------|--------|---------|------------------|------------------|
| Sb(1)–C(1)        | 2,108  | 2,16299 | –0,05            | 2,5              |
| Sb(1)–C(10)       | 2,130  | 2,16371 | –0,03            | 1,6              |
| Sb(1)–Cl(1)       | 2,487  | 2,47082 | 0,02             | 0,7              |
| Sb(1)–N(1)        | 2,385  | 2,63063 | –0,25            | 9,3              |
| Sb(1)–Pd(1)       | 2,4783 | 2,51671 | –0,04            | 1,5              |
| Pd(1)–Cl(2)       | 2,288  | 2,35167 | –0,06            | 2,7              |
| Pd(1)–Cl(3)       | 2,302  | 2,35155 | –0,05            | 2,1              |
| Pd(1)–Cl(4)       | 2,360  | 2,33178 | 0,03             | 1,2              |
|                   |        |         |                  |                  |
| C(1)–Sb(1)–C(10)  | 102,4  | 98,215  | 4,19             | 4,3              |
| C(1)–Sb(1)–Cl(1)  | 91,40  | 92,772  | –1,37            | 1,5              |
| C(10)–Sb(1)–Cl(1) | 91,10  | 91,186  | –0,09            | 0,1              |
| C(1)–Sb(1)–N(1)   | 76,00  | 72,492  | 3,51             | 4,8              |
| C(10)–Sb(1)–N(1)  | 88,80  | 82,680  | 6,12             | 7,4              |
| Cl(1)–Sb(1)–N(1)  | 167,05 | 162,919 | 4,13             | 2,5              |
| Cl(1)–Sb(1)–Pd(1) | 95,65  | 110,119 | –14,47           | 13,1             |
| N(1)–Sb(1)–Pd(1)  | 94,61  | 85,777  | 8,83             | 10,3             |
|                   |        |         |                  |                  |
| Cl(2)–Pd(1)–Sb(1) | 90,88  | 92,212  | –1,33            | 1,4              |
| Cl(3)–Pd(1)–Sb(1) | 83,76  | 82,293  | 1,47             | 1,8              |
| Cl(4)–Pd(1)–Sb(1) | 177,71 | 171,323 | 6,39             | 3,7              |
| Cl(2)–Pd(1)–Cl(3) | 174,36 | 174,119 | 0,24             | 0,1              |
| Cl(2)–Pd(1)–Cl(4) | 91,40  | 92,009  | –0,61            | 0,7              |

**Table S8** Comparison of selected bond lengths (Å) and angles (°) of the calculated and determined molecular structure of **4**.

|                   | X-ray  | DFT     | Abs. err.<br>(%) | Rel. err.<br>(%) |
|-------------------|--------|---------|------------------|------------------|
| Sb(1)–C(1)        | 2,131  | 2,15555 | –0,02            | 1,1              |
| Sb(1)–C(10)       | 2,133  | 2,14547 | –0,01            | 0,6              |
| Sb(1)–C(19)       | 2,147  | 2,16421 | –0,02            | 0,8              |
| Sb(1)–Pd(1)       | 2,4831 | 2,50603 | –0,02            | 0,9              |
| Pd(1)–Cl(1)       | 2,3029 | 2,31745 | –0,01            | 0,6              |
| Pd(1)–Cl(2)       | 2,3769 | 2,35913 | 0,02             | 0,8              |
| Pd(1)–N(1)        | 2,133  | 2,21860 | –0,09            | 3,9              |
|                   |        |         |                  |                  |
|                   |        |         |                  |                  |
| C(1)–Sb(1)–C(10)  | 103,64 | 101,792 | 1,85             | 1,8              |
| C(1)–Sb(1)–C(19)  | 100,23 | 101,082 | –0,85            | 0,8              |
| C(10)–Sb(1)–C(19) | 115,40 | 110,783 | 4,62             | 4,2              |
| Pd(1)–Sb(1)–C(1)  | 103,49 | 100,811 | 2,68             | 2,7              |
| Pd(1)–Sb(1)–C(10) | 110,42 | 122,066 | –11,65           | 9,5              |
| Pd(1)–Sb(1)–C(19) | 120,68 | 115,997 | 4,68             | 4,0              |
|                   |        |         |                  |                  |
|                   |        |         |                  |                  |
| Sb(1)–Pd(1)–Cl(1) | 82,12  | 84,161  | –2,04            | 2,4              |
| Sb(1)–Pd(1)–Cl(2) | 168,34 | 174,581 | –6,24            | 3,6              |
| Cl(1)–Pd(1)–Cl(2) | 91,51  | 92,736  | –1,23            | 1,3              |
| Sb(1)–Pd(1)–N(1)  | 94,55  | 93,133  | 1,42             | 1,5              |
| Cl(1)–Pd(1)–N(1)  | 173,96 | 175,888 | –1,93            | 1,1              |



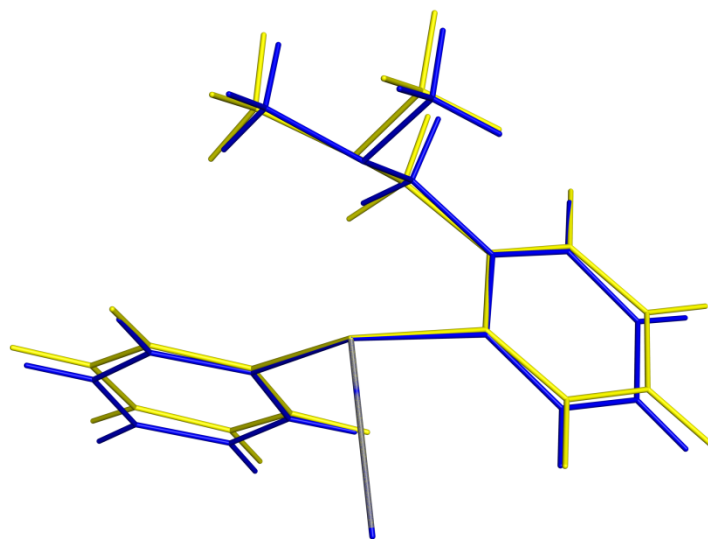

**Fig. S10** Overlay of the calculated (yellow) and determined (blue) molecular structure of **1**.

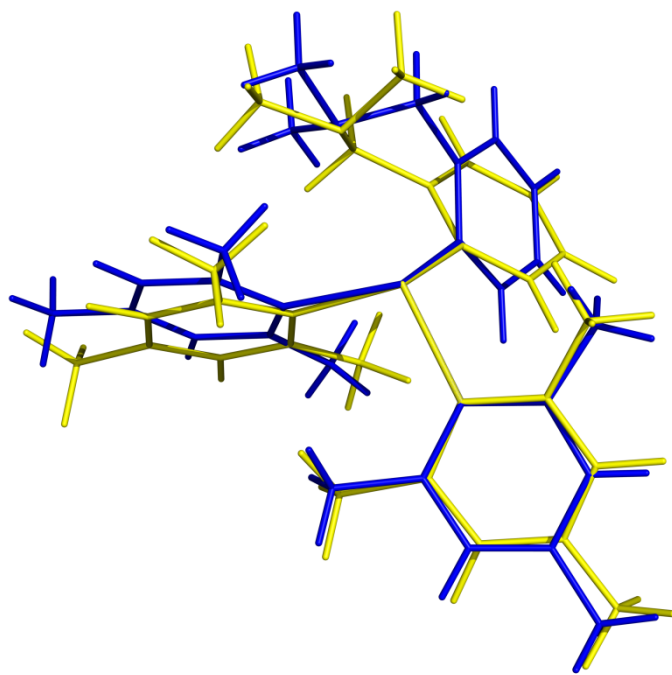

**Fig. S11** Overlay of the calculated (yellow) and determined (blue) molecular structure of **2**.

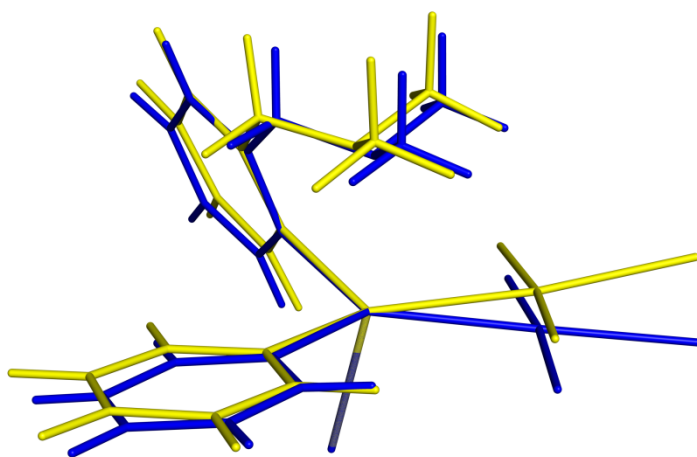

**Fig. S12** Overlay of the calculated (yellow) and determined (blue) molecular structure of the anion of **3**.

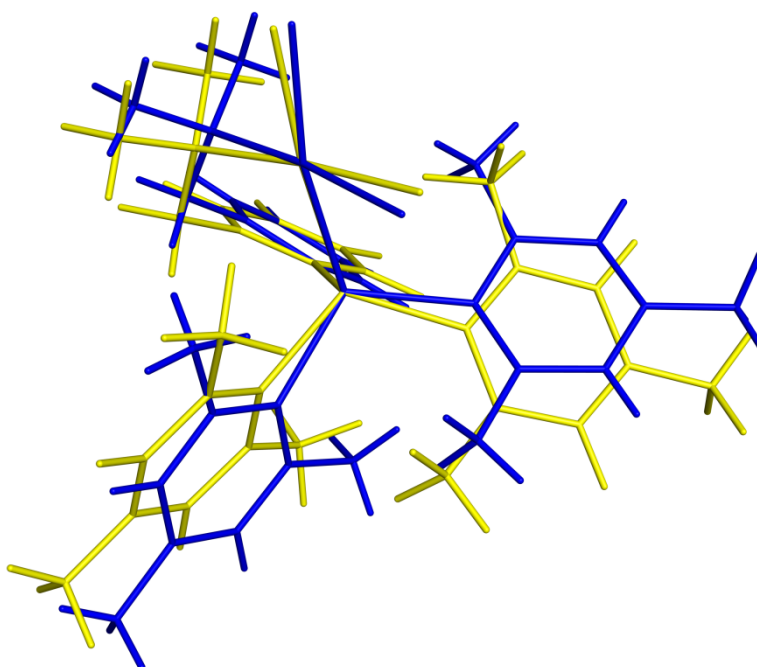

**Fig. S13** Overlay of the calculated (yellow) and determined (blue) molecular structure of **4**.

**Table S9** Cartesian coordinates (Å) of the optimized structure of 2-(Me<sub>2</sub>NCH<sub>2</sub>)C<sub>6</sub>H<sub>4</sub>(Ph)SbCl (**1**).

| Atom | x        | y         | z         |
|------|----------|-----------|-----------|
| C    | 4.902212 | 5.955814  | 2.908917  |
| C    | 6.134772 | 5.772701  | 3.585539  |
| C    | 7.331975 | 5.700118  | 2.847091  |
| H    | 8.284353 | 5.553841  | 3.375202  |
| C    | 7.317612 | 5.817349  | 1.447111  |
| H    | 8.257063 | 5.759923  | 0.883212  |
| C    | 6.097780 | 6.002429  | 0.775854  |
| H    | 6.077164 | 6.094331  | -0.317458 |
| C    | 4.896629 | 6.067879  | 1.505759  |
| H    | 3.946458 | 6.227574  | 0.979322  |
| C    | 6.161918 | 5.709840  | 5.099003  |
| H    | 7.107875 | 5.249178  | 5.463432  |
| H    | 6.123404 | 6.740872  | 5.502802  |
| C    | 4.799939 | 5.222203  | 7.066911  |
| H    | 5.644186 | 4.809273  | 7.661465  |
| H    | 3.866951 | 4.736788  | 7.402525  |
| H    | 4.719064 | 6.304419  | 7.262269  |
| C    | 5.042589 | 3.552087  | 5.321902  |
| H    | 5.887378 | 3.057896  | 5.849627  |
| H    | 5.174924 | 3.404429  | 4.236814  |
| H    | 4.099950 | 3.068595  | 5.630937  |
| C    | 3.541203 | 7.824822  | 5.130944  |
| C    | 4.444845 | 8.765892  | 4.594896  |
| H    | 4.909334 | 8.582295  | 3.616733  |
| C    | 4.754087 | 9.939510  | 5.304885  |
| H    | 5.459513 | 10.664525 | 4.878761  |
| C    | 4.157760 | 10.187959 | 6.554713  |
| H    | 4.398660 | 11.105107 | 7.106830  |
| C    | 3.244550 | 9.263096  | 7.089664  |
| H    | 2.766619 | 9.457551  | 8.058466  |
| C    | 2.937431 | 8.087936  | 6.378335  |
| H    | 2.217825 | 7.376012  | 6.807497  |
| Cl   | 1.818142 | 7.194439  | 2.312458  |
| N    | 4.984261 | 4.992291  | 5.627247  |
| Sb   | 3.057982 | 5.984908  | 4.079655  |

**Table S11** Cartesian coordinates (Å) of the optimized structure of 2-(Me<sub>2</sub>NCH<sub>2</sub>)C<sub>6</sub>H<sub>4</sub>SbMes<sub>2</sub> (**2**).

| Atom | x         | y         | z         |
|------|-----------|-----------|-----------|
| C    | 0.009903  | 0.055999  | -2.204162 |
| C    | -1.184394 | 0.322452  | -2.922062 |
| C    | -1.158407 | 0.341034  | -4.332532 |
| H    | -2.092860 | 0.528182  | -4.879647 |
| C    | 0.034449  | 0.126825  | -5.040897 |
| H    | 0.034202  | 0.145207  | -6.138032 |
| C    | 1.222942  | -0.114647 | -4.332292 |
| H    | 2.165317  | -0.283738 | -4.869062 |
| C    | 1.202268  | -0.150375 | -2.927597 |
| H    | 2.137258  | -0.349629 | -2.386880 |
| C    | -2.488661 | 0.608592  | -2.198093 |
| H    | -2.411541 | 1.589847  | -1.685379 |
| H    | -3.320692 | 0.703318  | -2.938531 |
| C    | -3.873919 | 0.005994  | -0.293961 |
| H    | -3.629575 | 0.968200  | 0.191821  |

**Table S10** Cartesian coordinates (Å) of the optimized structure of 2-(Me<sub>2</sub>NCH<sub>2</sub>)C<sub>6</sub>H<sub>4</sub>(Ph)SbCl, N atom not coordinated to Sb.

| Atom | x         | y         | z         |
|------|-----------|-----------|-----------|
| C    | 5.928153  | 7.042204  | 3.045771  |
| C    | 5.967599  | 5.733810  | 3.584557  |
| C    | 6.186080  | 4.639209  | 2.721883  |
| H    | 6.236950  | 3.633381  | 3.158285  |
| C    | 6.356684  | 4.835281  | 1.343056  |
| H    | 6.529826  | 3.974313  | 0.685104  |
| C    | 6.302405  | 6.134183  | 0.808682  |
| H    | 6.434048  | 6.296221  | -0.268729 |
| C    | 6.085603  | 7.232898  | 1.658715  |
| H    | 6.058716  | 8.246576  | 1.238224  |
| C    | 5.752921  | 5.475846  | 5.067091  |
| H    | 5.774091  | 6.458293  | 5.624486  |
| H    | 4.729458  | 5.077880  | 5.220375  |
| C    | 6.304843  | 4.112966  | 6.984742  |
| H    | 6.331059  | 4.952700  | 7.722459  |
| H    | 6.990769  | 3.325925  | 7.345511  |
| H    | 5.281124  | 3.697070  | 6.974708  |
| C    | 8.081070  | 4.985991  | 5.588716  |
| H    | 8.269762  | 5.867562  | 6.243169  |
| H    | 8.343146  | 5.273581  | 4.557073  |
| H    | 8.751817  | 4.166668  | 5.902411  |
| C    | 7.651728  | 8.548954  | 5.203917  |
| C    | 8.731661  | 8.211487  | 4.362921  |
| H    | 8.566736  | 8.075031  | 3.285905  |
| C    | 10.015862 | 8.029876  | 4.902497  |
| H    | 10.851989 | 7.762581  | 4.243863  |
| C    | 10.228344 | 8.180012  | 6.285714  |
| H    | 11.230339 | 8.029189  | 6.706553  |
| C    | 9.158174  | 8.530204  | 7.127276  |
| H    | 9.322521  | 8.655798  | 8.204984  |
| C    | 7.873081  | 8.718012  | 6.585999  |
| H    | 7.043299  | 8.987429  | 7.254831  |
| Cl   | 6.164781  | 10.420517 | 2.790924  |
| N    | 6.691934  | 4.523906  | 5.639635  |
| Sb   | 5.639533  | 8.718157  | 4.415822  |

**Table S12** Cartesian coordinates (Å) of the optimized structure of 2-(Me<sub>2</sub>NCH<sub>2</sub>)C<sub>6</sub>H<sub>4</sub>SbMes<sub>2</sub>; N atom not coordinated to Sb.

| Atom | x         | y         | z        |
|------|-----------|-----------|----------|
| C    | -0.318255 | 0.907893  | 2.360147 |
| C    | -0.830385 | 2.042295  | 3.035874 |
| C    | -2.061979 | 2.596312  | 2.619809 |
| H    | -2.452337 | 3.459263  | 3.174891 |
| C    | -2.779549 | 2.046973  | 1.548291 |
| H    | -3.735684 | 2.490493  | 1.242578 |
| C    | -2.268947 | 0.924060  | 0.873576 |
| H    | -2.824401 | 0.475285  | 0.040018 |
| C    | -1.048738 | 0.362809  | 1.282531 |
| H    | -0.685421 | -0.542492 | 0.777596 |
| C    | -0.100783 | 2.707823  | 4.194091 |
| H    | 0.740865  | 2.054630  | 4.539152 |
| H    | 0.373514  | 3.640338  | 3.826036 |
| C    | -1.570718 | 1.889383  | 5.948442 |
| H    | -0.814380 | 1.254473  | 6.463721 |

|    |           |           |           |    |           |           |           |
|----|-----------|-----------|-----------|----|-----------|-----------|-----------|
| H  | -4.009167 | -0.756932 | 0.492915  | H  | -2.076215 | 1.262313  | 5.194851  |
| H  | -4.844509 | 0.122835  | -0.833895 | H  | -2.322986 | 2.211664  | 6.690560  |
| C  | -3.016068 | -1.723767 | -1.745303 | C  | -0.300151 | 3.915658  | 6.273659  |
| H  | -3.935728 | -1.753563 | -2.377540 | H  | -1.006909 | 4.222315  | 7.065738  |
| H  | -3.112792 | -2.463603 | -0.932531 | H  | 0.078196  | 4.829238  | 5.779780  |
| H  | -2.155837 | -2.017177 | -2.369209 | H  | 0.564857  | 3.405917  | 6.767908  |
| C  | 2.162264  | 0.060423  | 0.242617  | C  | 1.611761  | -1.691210 | 1.688794  |
| C  | 2.861928  | 1.183473  | -0.289860 | C  | 1.766130  | -1.383448 | 0.303882  |
| C  | 4.268367  | 1.245654  | -0.187529 | C  | 1.778494  | -2.430991 | -0.639669 |
| H  | 4.791478  | 2.116048  | -0.609978 | H  | 1.888807  | -2.182004 | -1.704904 |
| C  | 5.014587  | 0.242134  | 0.450691  | C  | 1.680759  | -3.780751 | -0.258140 |
| C  | 4.302346  | -0.817283 | 1.041481  | C  | 1.628162  | -4.064569 | 1.117422  |
| H  | 4.858941  | -1.586128 | 1.597167  | H  | 1.616579  | -5.114565 | 1.443885  |
| C  | 2.897287  | -0.922830 | 0.968115  | C  | 1.610722  | -3.052879 | 2.102196  |
| C  | 2.159311  | 2.348358  | -0.963162 | C  | 1.976443  | 0.034078  | -0.197374 |
| H  | 2.764851  | 3.268156  | -0.885045 | H  | 1.072396  | 0.663227  | -0.099954 |
| H  | 1.173706  | 2.561356  | -0.507951 | H  | 2.263067  | 0.035497  | -1.262948 |
| H  | 1.978164  | 2.157954  | -2.037559 | H  | 2.785566  | 0.542708  | 0.361547  |
| C  | 6.524816  | 0.296944  | 0.512016  | C  | 1.645620  | -4.885967 | -1.289723 |
| H  | 6.975038  | -0.348936 | -0.266985 | H  | 0.604665  | -5.099145 | -1.602094 |
| H  | 6.905613  | -0.058261 | 1.486698  | H  | 2.067185  | -5.827001 | -0.894159 |
| H  | 6.903607  | 1.321354  | 0.349284  | H  | 2.209664  | -4.612904 | -2.199298 |
| C  | 2.249712  | -2.072740 | 1.715375  | C  | 1.637046  | -3.490790 | 3.553694  |
| H  | 1.919310  | -2.882058 | 1.041172  | H  | 2.266708  | -2.835874 | 4.179235  |
| H  | 1.353780  | -1.755078 | 2.275508  | H  | 2.032230  | -4.517965 | 3.638050  |
| H  | 2.958893  | -2.511535 | 2.438603  | H  | 0.632974  | -3.483941 | 4.013829  |
| C  | -0.625642 | -1.978562 | 0.419694  | C  | 0.709161  | -0.726753 | 4.915584  |
| C  | -0.288666 | -3.103214 | -0.380781 | C  | 1.450160  | -0.458735 | 6.101790  |
| C  | -0.907345 | -4.344486 | -0.120990 | C  | 0.898203  | -0.794022 | 7.354652  |
| H  | -0.640313 | -5.207594 | -0.748194 | H  | 1.475320  | -0.576552 | 8.264672  |
| C  | -1.848528 | -4.515886 | 0.909595  | C  | -0.368400 | -1.394240 | 7.475048  |
| C  | -2.131787 | -3.403154 | 1.720958  | C  | -1.074348 | -1.667695 | 6.291622  |
| H  | -2.833522 | -3.518052 | 2.559616  | H  | -2.062702 | -2.144848 | 6.359085  |
| C  | -1.530151 | -2.144894 | 1.504637  | C  | -0.565584 | -1.347970 | 5.014168  |
| C  | 0.725849  | -3.040896 | -1.500988 | C  | 2.820070  | 0.194474  | 6.080429  |
| H  | 0.277575  | -2.661985 | -2.437636 | H  | 3.533561  | -0.352465 | 5.436854  |
| H  | 1.142363  | -4.041664 | -1.710565 | H  | 3.252497  | 0.235493  | 7.095036  |
| H  | 1.564530  | -2.366408 | -1.256727 | H  | 2.775070  | 1.232747  | 5.698490  |
| C  | -2.518128 | -5.853604 | 1.134445  | C  | -0.930377 | -1.766566 | 8.828759  |
| H  | -3.113642 | -5.862082 | 2.063833  | H  | -2.034376 | -1.785318 | 8.819984  |
| H  | -1.775023 | -6.669904 | 1.199703  | H  | -0.605317 | -1.058891 | 9.612004  |
| H  | -3.198762 | -6.103773 | 0.298207  | H  | -0.586694 | -2.773772 | 9.135103  |
| C  | -1.837450 | -1.031593 | 2.488795  | C  | -1.430143 | -1.683905 | 3.818314  |
| H  | -2.118698 | -0.089031 | 1.987569  | H  | -2.086808 | -2.543479 | 4.040331  |
| H  | -0.955162 | -0.802864 | 3.118591  | H  | -0.835795 | -1.930483 | 2.923219  |
| H  | -2.659570 | -1.315250 | 3.168688  | H  | -2.077391 | -0.830418 | 3.543820  |
| N  | -2.781576 | -0.397460 | -1.173180 | N  | -0.983919 | 3.067401  | 5.303822  |
| Sb | -0.037226 | 0.095026  | -0.007254 | Sb | 1.577997  | 0.035324  | 3.042116  |

**Table S13** Cartesian coordinates (Å) of the optimized structure of  $[(2-(\text{Me}_2\text{NCH}_2)\text{C}_6\text{H}_4)(\text{Ph})(\text{Cl})\text{SbPdCl}_3]^-$ ; anion of **3**.

| Atom | x        | y        | z        |
|------|----------|----------|----------|
| C    | 5.360101 | 4.884780 | 3.003466 |
| C    | 6.333688 | 5.524820 | 3.805071 |
| C    | 7.618167 | 5.760248 | 3.276673 |
| H    | 8.376245 | 6.251066 | 3.903297 |
| C    | 7.936510 | 5.362862 | 1.967486 |
| H    | 8.943058 | 5.546280 | 1.569272 |
| C    | 6.970351 | 4.713481 | 1.179712 |
| H    | 7.217694 | 4.382208 | 0.162876 |
| C    | 5.686223 | 4.472856 | 1.699569 |

**Table S14** Cartesian coordinates (Å) of the optimized structure of  $[2-(\text{Me}_2\text{NHCH}_2)\text{C}_6\text{H}_5]^+$ ; cation of **3**.

| Atom | x         | y         | z        |
|------|-----------|-----------|----------|
| H    | 0.915061  | 1.126705  | 3.787861 |
| C    | -0.411035 | 0.349981  | 1.682162 |
| C    | -0.887759 | 1.680880  | 1.671581 |
| H    | -0.193301 | 2.519294  | 1.827989 |
| C    | -2.244291 | 1.943889  | 1.425394 |
| H    | -2.607193 | 2.978222  | 1.410471 |
| C    | -3.130758 | 0.880050  | 1.176448 |
| H    | -4.188418 | 1.086312  | 0.974024 |
| C    | -2.661209 | -0.445581 | 1.171405 |

|    |          |           |          |   |           |           |          |
|----|----------|-----------|----------|---|-----------|-----------|----------|
| H  | 4.929482 | 3.962372  | 1.091483 | H | -3.349884 | -1.272604 | 0.962734 |
| C  | 5.977066 | 5.963104  | 5.211790 | C | -1.306247 | -0.711733 | 1.427012 |
| H  | 6.896259 | 6.115273  | 5.823339 | H | -0.940239 | -1.747040 | 1.413497 |
| H  | 5.448290 | 6.936071  | 5.169347 | C | 1.032717  | 0.082741  | 2.001567 |
| C  | 4.411404 | 5.533561  | 7.045954 | H | 1.357381  | -0.933364 | 1.719985 |
| H  | 5.146631 | 5.706307  | 7.863128 | H | 1.706717  | 0.813688  | 1.521957 |
| H  | 3.638019 | 4.820542  | 7.382944 | C | 0.557192  | -0.829021 | 4.316823 |
| H  | 3.915739 | 6.487215  | 6.800601 | H | -0.513413 | -0.767018 | 4.070895 |
| C  | 5.761836 | 3.725485  | 6.159001 | H | 0.715402  | -0.638656 | 5.389225 |
| H  | 6.576975 | 3.899819  | 6.895979 | H | 0.949615  | -1.821839 | 4.047361 |
| H  | 6.178961 | 3.279936  | 5.241066 | C | 2.772774  | 0.208091  | 3.830044 |
| H  | 5.032406 | 3.004835  | 6.567173 | H | 2.916401  | 0.341655  | 4.913224 |
| C  | 2.812288 | 6.540825  | 4.213319 | H | 3.259602  | 1.029078  | 3.281735 |
| C  | 3.397456 | 7.580935  | 3.462683 | H | 3.197362  | -0.756903 | 3.512933 |
| H  | 4.144632 | 7.348090  | 2.691551 | N | 1.301064  | 0.207959  | 3.518480 |
| C  | 3.026974 | 8.917495  | 3.696143 |   |           |           |          |
| H  | 3.490435 | 9.722735  | 3.110448 |   |           |           |          |
| C  | 2.060720 | 9.220051  | 4.673224 |   |           |           |          |
| H  | 1.770544 | 10.263467 | 4.854978 |   |           |           |          |
| C  | 1.462930 | 8.182253  | 5.409972 |   |           |           |          |
| H  | 0.702173 | 8.411786  | 6.167783 |   |           |           |          |
| C  | 1.834292 | 6.843246  | 5.183134 |   |           |           |          |
| H  | 1.377421 | 6.029240  | 5.764257 |   |           |           |          |
| Cl | 2.306549 | 4.490903  | 1.654024 |   |           |           |          |
| Cl | 1.351401 | 3.552137  | 6.542526 |   |           |           |          |
| Cl | 4.410913 | 1.452080  | 3.663078 |   |           |           |          |
| Cl | 2.630441 | 0.439350  | 6.379086 |   |           |           |          |
| N  | 5.068602 | 4.993024  | 5.845725 |   |           |           |          |
| Pd | 2.829579 | 2.395488  | 5.125657 |   |           |           |          |
| Sb | 3.414248 | 4.492332  | 3.862632 |   |           |           |          |

**Table S15** Cartesian coordinates (Å) of the optimized structure of [(2-(Me<sub>2</sub>NCH<sub>2</sub>)C<sub>6</sub>H<sub>4</sub>)Mes<sub>2</sub>SbPdCl<sub>2</sub>] (4); N coordinated to Pd.

| Atom | x         | y         | z         |
|------|-----------|-----------|-----------|
| C    | -0.283228 | 2.165712  | 2.164917  |
| C    | -1.093621 | 2.270876  | 3.320383  |
| C    | -2.297347 | 1.535367  | 3.374846  |
| H    | -2.928377 | 1.607518  | 4.271015  |
| C    | -2.697533 | 0.721211  | 2.303441  |
| H    | -3.637607 | 0.159427  | 2.364400  |
| C    | -1.891957 | 0.632299  | 1.154899  |
| H    | -2.197358 | -0.001025 | 0.312602  |
| C    | -0.689298 | 1.355624  | 1.088088  |
| H    | -0.059120 | 1.281776  | 0.191026  |
| C    | -0.688997 | 3.128329  | 4.502079  |
| H    | -1.296592 | 2.826146  | 5.380473  |
| H    | 0.369648  | 2.955365  | 4.772617  |
| C    | -2.264996 | 4.919470  | 3.926505  |
| H    | -2.974931 | 4.498524  | 4.669316  |
| H    | -2.466588 | 4.472383  | 2.940924  |
| H    | -2.382236 | 6.012370  | 3.860235  |
| C    | -0.567986 | 5.249087  | 5.647663  |
| H    | -0.673090 | 6.341144  | 5.553747  |
| H    | 0.467135  | 5.008910  | 5.941295  |
| H    | -1.264619 | 4.860202  | 6.419574  |
| C    | 2.133390  | 3.138866  | 0.078638  |
| C    | 1.222652  | 3.528457  | -0.944527 |
| C    | 1.572892  | 3.265383  | -2.284547 |
| H    | 0.871336  | 3.560678  | -3.076942 |
| C    | 2.796786  | 2.670275  | -2.638358 |

**Table S16** Cartesian coordinates (Å) of the optimized structure of [(2-(Me<sub>2</sub>NCH<sub>2</sub>)C<sub>6</sub>H<sub>4</sub>)Mes<sub>2</sub>SbPdCl<sub>2</sub>]; N coordinated to Sb.

| Atom | x         | y        | z         |
|------|-----------|----------|-----------|
| C    | -0.447640 | 2.522179 | 1.499861  |
| C    | -1.207285 | 2.298401 | 2.673942  |
| C    | -2.295572 | 1.402473 | 2.616469  |
| H    | -2.892206 | 1.240672 | 3.524350  |
| C    | -2.621154 | 0.717395 | 1.436569  |
| H    | -3.473912 | 0.027612 | 1.419367  |
| C    | -1.845625 | 0.920101 | 0.284842  |
| H    | -2.072623 | 0.382120 | -0.643726 |
| C    | -0.766107 | 1.817656 | 0.321574  |
| H    | -0.146824 | 1.924511 | -0.575329 |
| C    | -0.848674 | 2.910222 | 4.013189  |
| H    | -1.698630 | 2.762864 | 4.721907  |
| H    | 0.016373  | 2.362875 | 4.437974  |
| C    | -1.621401 | 5.139366 | 3.477336  |
| H    | -2.466101 | 5.075680 | 4.201973  |
| H    | -1.972361 | 4.805915 | 2.488217  |
| H    | -1.308017 | 6.189235 | 3.372687  |
| C    | 0.020508  | 4.813074 | 5.205480  |
| H    | 0.365810  | 5.854637 | 5.099682  |
| H    | 0.863884  | 4.189133 | 5.543411  |
| H    | -0.771254 | 4.785499 | 5.989875  |
| C    | 2.308728  | 3.089481 | -0.295392 |
| C    | 1.622139  | 3.349236 | -1.515856 |
| C    | 2.175741  | 2.862103 | -2.718341 |
| H    | 1.636196  | 3.050647 | -3.657230 |
| C    | 3.403833  | 2.180427 | -2.757371 |

|    |           |           |           |    |           |           |           |
|----|-----------|-----------|-----------|----|-----------|-----------|-----------|
| C  | 3.705360  | 2.374113  | -1.606440 | C  | 4.109521  | 2.041326  | -1.549565 |
| H  | 4.690625  | 1.961446  | -1.864874 | H  | 5.105533  | 1.576842  | -1.564056 |
| C  | 3.410090  | 2.607370  | -0.247204 | C  | 3.603200  | 2.498890  | -0.315162 |
| C  | -0.055374 | 4.289581  | -0.665544 | C  | 0.390455  | 4.225475  | -1.624926 |
| H  | -0.646228 | 4.419384  | -1.587592 | H  | -0.217472 | 3.950981  | -2.504542 |
| H  | 0.184746  | 5.294568  | -0.267358 | H  | 0.696477  | 5.282495  | -1.743534 |
| H  | -0.708861 | 3.792352  | 0.072862  | H  | -0.276188 | 4.211315  | -0.747967 |
| C  | 3.129777  | 2.363720  | -4.080646 | C  | 3.951651  | 1.630795  | -4.054558 |
| H  | 2.844821  | 1.324384  | -4.335625 | H  | 3.543242  | 0.621147  | -4.255306 |
| H  | 4.211684  | 2.463194  | -4.278373 | H  | 5.051658  | 1.540871  | -4.027490 |
| H  | 2.590521  | 3.031867  | -4.774513 | H  | 3.679828  | 2.269238  | -4.913802 |
| C  | 4.490943  | 2.324552  | 0.776040  | C  | 4.502322  | 2.389538  | 0.898135  |
| H  | 4.593279  | 3.145495  | 1.506527  | H  | 4.476275  | 3.314394  | 1.499908  |
| H  | 5.467129  | 2.201115  | 0.277544  | H  | 5.546873  | 2.231967  | 0.580374  |
| H  | 4.297666  | 1.404932  | 1.356080  | H  | 4.229279  | 1.550686  | 1.561797  |
| C  | 2.767482  | 2.406923  | 3.490985  | C  | 2.348388  | 2.782986  | 3.211076  |
| C  | 3.515047  | 3.200036  | 4.405111  | C  | 2.938632  | 3.545980  | 4.253576  |
| C  | 4.272923  | 2.541540  | 5.396100  | C  | 3.445409  | 2.861409  | 5.380869  |
| H  | 4.852571  | 3.150199  | 6.103941  | H  | 3.895680  | 3.453820  | 6.189484  |
| C  | 4.321571  | 1.139791  | 5.499432  | C  | 3.398638  | 1.463438  | 5.501449  |
| C  | 3.594256  | 0.385083  | 4.561050  | C  | 2.838459  | 0.736274  | 4.436141  |
| H  | 3.638377  | -0.712356 | 4.607398  | H  | 2.809655  | -0.361077 | 4.493896  |
| C  | 2.817614  | 0.987990  | 3.550604  | C  | 2.316295  | 1.359970  | 3.284699  |
| C  | 3.554607  | 4.711878  | 4.349122  | C  | 3.100102  | 5.046037  | 4.222267  |
| H  | 3.822502  | 5.094256  | 3.346224  | H  | 4.012079  | 5.327049  | 3.665210  |
| H  | 4.285523  | 5.115766  | 5.069223  | H  | 3.177799  | 5.456186  | 5.243329  |
| H  | 2.569065  | 5.165363  | 4.576108  | H  | 2.271622  | 5.556713  | 3.704000  |
| C  | 5.169885  | 0.461947  | 6.551571  | C  | 3.969308  | 0.756311  | 6.709581  |
| H  | 4.704183  | -0.473780 | 6.908417  | H  | 3.342457  | -0.102038 | 7.010741  |
| H  | 5.338900  | 1.117144  | 7.423665  | H  | 4.061871  | 1.435424  | 7.574579  |
| H  | 6.163555  | 0.196460  | 6.141514  | H  | 4.979457  | 0.360322  | 6.489656  |
| C  | 2.099981  | 0.087243  | 2.566982  | C  | 1.768980  | 0.451116  | 2.199984  |
| H  | 2.597248  | -0.896025 | 2.505555  | H  | 2.306377  | -0.512889 | 2.208727  |
| H  | 2.074993  | 0.512070  | 1.547408  | H  | 1.871621  | 0.873065  | 1.186235  |
| H  | 1.050030  | -0.086537 | 2.865531  | H  | 0.695901  | 0.234973  | 2.353248  |
| Cl | 2.052652  | 6.538398  | 1.434102  | N  | -0.481209 | 4.325171  | 3.917351  |
| Cl | -0.439949 | 7.701568  | 3.406900  | Sb | 1.349088  | 3.738776  | 1.546796  |
| N  | -0.862693 | 4.619555  | 4.326870  | Cl | -0.743442 | 6.721126  | 0.731049  |
| Pd | 0.503109  | 5.603831  | 2.881890  | Cl | 3.724947  | 6.053371  | 1.085425  |
| Sb | 1.463767  | 3.426548  | 2.096534  | Pd | 1.431408  | 6.184809  | 1.132062  |

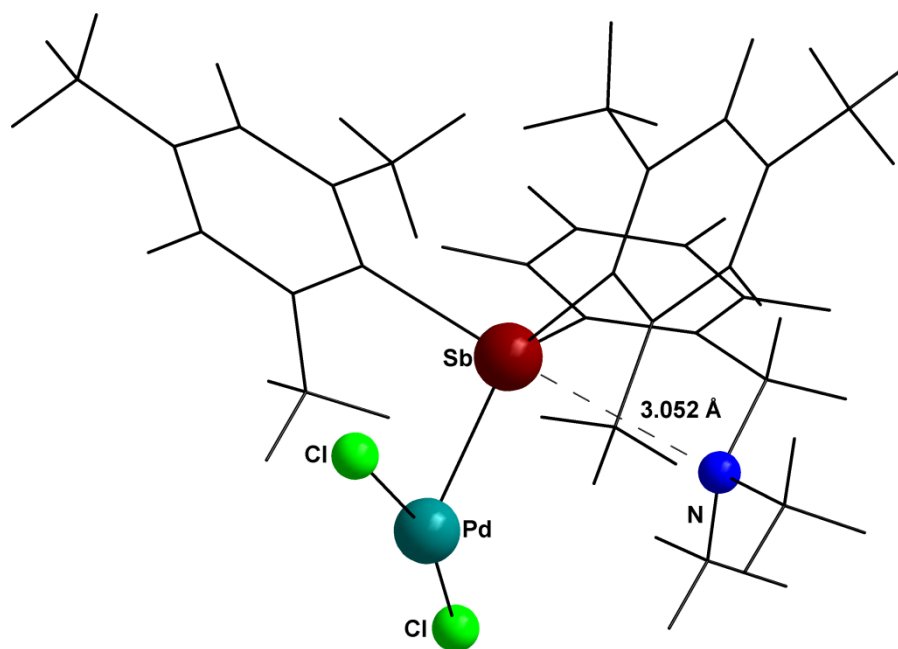

**Fig. S14** Theoretically calculated alternative structure for compound **4**. Nitrogen atom is weakly coordinated to antimony ( $\text{N}\cdots\text{Sb}$  3.052 Å).
